# Supplementary material for: Diarrhea incidence in low- and middle-income countries in 1990 and 2010: a systematic review
Source: BMC Public Health. 2012 Mar 21;12:220. doi: 10.1186/1471-2458-12-220 (PMC3323412; doi:10.1186/1471-2458-12-220)
Supplement: Additional file 1 — Characteristics of included studies. [file 1471-2458-12-220-S1.XLSX]

## Sheet: Sheet1
First author	Year	Ref	Country	City/District/ Province (most specific)	Study Type	Urban/Rural/ Peri-urban	Study start year	Study Duration (months)	Sample size (child-yrs)	Sample size (children)	Incidence rate (/child-yr)
Chen	1981	Am J Epi.1981;114(2): 284-292	Bangladesh	Matlab thana, Comilla district	Surveillance	Rural	1978-06-01	12		207	0-59m 4.1
Mathur	1985	Human Nut.Clinical Nut. 1985; 37:447-454	India	Hyderabad	Surveillance	Periurban		12		721	0-60m 3.1; 6-12m 1.6
Cruz	1989	Arch Latinoamericano Nutr. 1989;39(3):263-77	Guatemala	Guatemala city	Surveillance	Periurban Slum		12		130	0-5m 4.54; 0-11m 5.2; 0-48m 6.19
Bhan	1989	Bull WHO. 1989;67(3):281-8	India	Near Delhi	Surveillance	Rural	1985	12	657.3		0-5m 1.6; 6-11m 1.34; 0-11m 1.39; 12-23m 0.79; 24-35m 0.578; 36-47m 0.564; 0-59m 0.386;
Aziz	1990	Trans R Soc Trop Med Hyg. 1990 May-Jun;84(3):433-8	Bangladesh	Mirzapur-upazila	Water & sanitation intervention	Rural	1984-01-01	46	550.25		0-5m 2.27; 6-11m 4.63; 12-23m 5.17; 24-35m 4.15; 36-59m 2.73;
Aziz	1990	Trans R Soc Trop Med Hyg. 1990 May-Jun;84(3):433-8	Bangladesh	Mirzapur-upazila	Water & sanitation intervention	Rural	1985-01-01	46	684.14		0-5m 2.73; 6-11m 4.62; 12-23m 4.64; 24-35m 4.11; 36-59m 2.64; 12-59m 3.59
Aziz	1990	Trans R Soc Trop Med Hyg. 1990 May-Jun;84(3):433-8	Bangladesh	Mirzapur-upazila	Water & sanitation intervention	Rural	1986-01-01	46	675.19		0-5m 2.46; 6-11m 4.10; 12-23m 2.26; 24-35m 3.04; 36-59m 2.23; 12-59m 2.38
Aziz	1990	Trans R Soc Trop Med Hyg. 1990 May-Jun;84(3):433-8	Bangladesh	Mirzapur-upazila	Water-sanitation intervention	Rural	1987-01-01	46	680.44		0-5m 2.26; 6-11m 4.25; 12-23m 4.20; 24-35m 3.34; 36-59m 2.46; 12-59m 3.12
Yang	1990	J Dia Dis Research. 1990;8(5): 155-9	China	Hebei county, Anguo	Surveillance	Rural	1986-03-01	12		270	0-6m 4.23; 6-11m 3.78; 12-23m 2.25; 24-35m 1.62; 36-47m 1.67
Yang	1990	Journal of Diarrhoeal Diseases Research 8(4)-155-159	China	Hebei Province, China	Surveillance	Rural	1986	11		270	0-5m 4.23; 6-11m 3.78; 12-23m 2.25; 24-35m 1.62; 36-47m 1.67; 0-60m 2.5
Cravioto	1990	Am J Epidemiol. 1990 May;131(5):886-904	Mexico	Lugar sobre la teirra blanca	Surveillance	Rural	1985-08-01	18.3		75	0-12m 4.0
Chowdhury	1991	Trans Roy Soc Trop Med Hyg. 1991;85:128-30	Bangladesh	Matlab	Surveillance	Rural	1986	12	872.6		0-59m 5.41
Ferreccio	1991	Am J Epi. 1991;134(6): 614-27	Chile	Santa Julio, Santiago	Surveillance	Rural	1986-11-01	30.4	829.25	504	0-11m 2.26; 12-23m 2.09; 24-35m 1.46; 36-47m 1.28; 48-59m 0.90
Wright	1991	American Journal of Epidemiology 134(8)- 887-894.	Egypt	Bilbeis, Egypt	Surveillance	Rural	1981	12		317	0-12m 4.8
Uribe	1991	Bol Med Hosp Infant Mex. 1991;48(5):320-5	Mexico		Prospective cohort study of ORS acceptability and use	Rural	1986	18		75	0-23m 4.0
Oni	1991	J Dia Dis Research. 1991;9(3):250-7	Nigeria	Illorin, Kwara	Surveillance	Rural	1989-02-01	12	281.4	351	0-36m 2.64; 0-5m 3.3; 6-11m 4.1; 12-23m 2.9; 24-36m 2.2
Javaid	1991	Acta Ped Scand. 1991;374: 141-50	Pakistan	Lahore	Factorial trial of iron-fortified vs. non-fortified cereal vs. standard local diet (comparator)	Urban slum	1987	26		44	5-11m 7.4
Lanata	1991	J Ped Gastro & Nut. 1991;12(1): 82-88	Peru	Canto Grande, Lima	Surveillance	Periurban	1985-01-01	27	657.2	677	0-5m 7.3; 6-11m 10.3; 12-17m 9.4; 18-23m 8.8; 24-29m 7.0; 30-35m 5.6; 0-59m 8.1
Moy	1991	Journal of Tropical Pediatrics. 1991; Dec 37:293-299.	Zimbabwe	Shamva District	Surveillance	Rural	1987	22	269	204	0-6m 2.0; 7-12m 5.2; 13-18m 6.0; 19-24m 4.4; 25-30m 3.0; 0-30m 4.1
Rahmathullan	1991	AJCN. 1991;54:568-77	India		Community-based Vitamin A RCT; both arms had same morbidity	Rural	1989	12		15419	5-69 mo 5.6
Baqui	1993	Am J Epidemiol. 1993;137:355-65	Bangladesh	Matlab	Surveillance	Rural	1988-05-01	12	495.69	705	0-11m 5.61; 12-23m 5.46; 24-35m 4.25; 36-47m 3.42; 48-59m 2.09; 0-59m 4.6
Brunser	1993	Eur J Clin Nutr.1993;47:317-26	Chile	Sanitago	Double blind randomSequential trial of fortified vs. non-fortified milk	Peri urban slum		12			3-21m 3.5
Lie	1993	Eur J Clin Nut. 1993;47(22):88-96	China	Hebei Province	Community-based RCT of Vitamin A	Rural	1989	12		74	6-11m 1.77; 12-23m 1.82; 24-35m 1.65; 6-35m 1.76
Barreto	1994	Lancet. 1994; 344: 228-31	Brazil	Serrinha, Salvador	RCT vit A	urban	1990-12-01	12	552.48		6-48m 7.1
Cruz	1994	The Pediatric Infectious Disease Journal. 1994;13: 216-223.	Guatemala	Santa Maria de Jeusus	Surveillance	Rural		24		321	0-35m 7.02
Anand	1994	Indian Pediatrics. 1994;31:943-8	India	Garkhera and Atali villages/Faridabad/Haryana	Surveillance	Rural	1988	12	249.33	250	6-59m 2.88
Lal	1994	Ind J Pub Health. 1994;38(2):65-8	India	Haryana	Surveillance	Rural	1984	12		2278	0-11 6.0; 11-23 5.49; 23-35 4.19
Molla	1995	Journal of Diarrhoeal Diseases Research 13(1)-8-11.	Bangladesh	Dhaka, Bangladesh	Use of Rice Oral Rehydration for Dysentary	Rural		24		721	0-48m 3.4
Ramakrishnan	1995	Am J Clin Nut. 1995;61: 1295-1303	India	Tamil Nadu	Community-based Vitamin A RCT	Rural	1989	12		274	6-48m 1.77
Santosham	1995	Journal of diarrhoeal diseases research 13(1)- 18-28.	USA	White Mountain Apache Tribe, Whiteriver, Arizona	Surveillance	Rural	1981	36	247.6	112	0-36m 4.47
Linhares	1996	Bull WHO. 1996; 74(5): 491-500	Brazil	Belem	RCT of Rotavirus vaccine efficacy	Urban	1990	24	363		0-29m 6.0
Gupta	1996	Tran Roy Soc Trop Med.1996;90:544-47	India	Near Calcutta	Surveillance	Periurban	1992-08-01	28.4	560		0-5m 2.09; 6-11m 3.09; 12-17m 2.20; 18-23m 1.83; 24-29m 1.45; 30-35m 1.18 ; 36-41m 1.35; 42-47m 0.75; 0-48m 1.71
Ventakarao	1996	Indian Ped. 1996;33(4): 279-286	India	Tamil Nadu	Community-based RCT of vitamin A supplementation in mothers and infants	Rural	1991	26		233	0-6m 1.3; 0-11m 4.2
Dibley	1996	J Nutr. 1996 Feb;126(2):434-42.	Indonesia	Java	RCT vit A	Rural		12	749.54		6-48m 0.84
Mitra	1997	J Nut. 1997;127(8): 1451–55	Bangladesh	Dhaka	RCT of iron supplementation	Peri urban slum	1990	24		131	0-48m 2.5; 12-48m 2.2; 0-11m 3.7
Kolsteren	1997	Annals Top Med. 1997;17: 201-208	Indonesia	Island of Madura	Surveillance	Rural	1987-01-01	18			0-5m 0.5; 6-11m 0.6
Mirza	1997	Am J Epi. 1997;146(9): 776-785	Kenya	Kibera, Nairobi	Surveillance	Urban Slum	1988-04-01	14	430.8	920	3-37m 3.5
Rosado	1997	Am J Clin Nut. 1997;65(1): 13-19	Mexico		Community-based RCT of iron or iron+zinc supplementation	Rural		12		56	18-48m 1.1
Espinoza	1997	Pediatric Infectious Disease Journal:1997 Jun;16(6):564-571.	Nicaragua	Leon	Rota surveillance	Suburban	1991	36		235	0-24m 1.9
Guerrero	1998	Ped Inf Dis J. 1998;17(8):723-727	Mexico	Mexico city	Diarrhea/Etiology Surveillance	Urban Slum	1988-11-01	36	243.3	214	0-18m 2.9
Ibrahim	1998	Annals of Tropical Paediatrics.1998;18:145-154	Somalia	Unspecified village (10 km from Shabeele River and 40 km from Mogadishu	Surveillance	Rural	1987	12		403	0-60m 1.4
Abu Elyazeed	1999	J Infec Dis.1999;179:382–9	Egypt	Abees	Surveillance	Periurban	1993-11-01	23.2667	216.2		0-11m 4.9; 12-23m 2.5; 24-35m 1.0;
Oberhelman	1999	J Ped. 1999;134(1): 15-20	Peru	Pampas de San Juan de Miraflores	Efficacy trial of lactobacillus GG	Peri Urban	1995	15	77.1		6-41m 6.02; 6-17m 6.44 ; 18-29m 6.19; 30-41m 5.21
Lima	2000	JID. 2000;181(5);1643-51 / JID.1999; 180(1): 167-75 (Newman et al 199)	Brazil	Gonclaves Dias	Surveillance	Periurban slum	1989-08-01	45	281	189	0-45m 5.25; 13-24m 6.8
Naficy	2000	JID.2000;182(1): 685-90	Egypt	Abu Homos	Surveillance	Rural	1995-02-01	36	636.7		0-5m 7.33; 6-11m 8.79; 12-23m 5.5; 24-35m 2.92; 0-35m 5.46
Moore	2001	International Journal of Epidemiology. 2001;30: 1457-1464.	Brazil	Goncalves Dias	Surveillance	Rural	1989	112		119	0-24m 9.1
Mahmud	2001	Journal of Health and Population Nutrition 19(4)-313-319	Egypt	Bilbeis, Egypt	Surveillance	Rural	1987	18		152	0-12m 4.87
Ali	2001	Ethiopian Journal of Health Development, 2001, 15(3): 165-172	Ethiopia	Eastern Tigray, Nothern Ethiopia	Surveillance	Rural	1997	12	996	1034	0-60m 3.05
Van de Hoek	2002	J Health Pop Nut. 2002;20(1): 77-84	Pakistan	Hakar, Bahawalnagar, Punjab	Surveillance and Domestic water supply	Rural	1998-05-01	12		186	12-23m 5.18; 0-11m 5.84; 24-35m 5.14; 36-47m 2.06 ; 48-59m 1.61; 0-59m 3.94
Checkley	2002	Journal of Pediatrics. 2002;140: 210-218.	Peru	Pampas de San Juan/Lima	Surveillance	Peri urban	1995	45	437	230	0-36m 3.2
Bern	2002	Emer Infect Dis. 2002;8(6):581-5	Peru	Pampas de San Juan de Miraflores	Surveillance	Periurban	1995	47	889		12-23m 3.3
Baqui	2003	J Nutr.2003;133: 4150–4157, 2003	Bangladesh	Matlab	Community-based factorial trial of multiple micronutrient supplement, zinc, iron, or iron+zinc	Rural		12	74.3 child-yrs	157	6-11m 8.3
Haque	2003	Am J Trop Med Hyg. 2003;69(4):398-405	Bangladesh	Dhaka	E hystolitica surveillance	Urban Slum	1999	43	820.86	289	24-60m 1.76; 24-36m 2.5; 37-48m 1.38; 49-60m 1.69
Moraes	2003	Transactions of the Royal Society of Tropical Medicine and Hygeine. 2003;97:153-158	Brazil	Salvador	Surveillance	Urban	1989	12	313.164	432	0-60m 5.55
Castro	2003	Bras J Infect Dis. 2003;7(6):387-94	Brazil	Ceara	Prospective cohort study of association between cellular immunity and morbidity	Urban Slum		12	52.66		6-21m 6.97
Rao	2003	Journal of Clinical Microbiology 41(10)- 4862-4864.	Egypt	2 villages near Nile Delta	ETEC epidemiology surveillance	Rural	1995	36		397	0-5m 7.33; 6-11m 8.81; 12-17m 6.40; 18-23m 4.61; 24-35m 2.92; 0-35m 5.46
Reller	2003	Am J Trop Med Hyg.2003;69(4):411-19	Guatemala		Community-based RCT of water flocculent-disinfectant	Rural	1989	12		274	0-11m 6.87
Jensen	2004	Tropical Medicine and International Health. 2004;9: 1210-1215.	Pakistan	Punjab	Surveillance	Rural		12	136.8	209	0-60m 3.30
Strina	2005	Trans R Soc Trop Med Hyg. 2005 Jun;99(6):407-16	Brazil	Salvador, Brazil	Evolution and duration of diarrhea	Urban	1997	18.5	890	1156	0-36m 2.7
Assis	2005	Eur J Clin Nut. 2005;59:1317-1323.	Brazil	Serrinha/Bahia	Diarhea surveillance/association bw diarrhea and growth		1990	12	487	487	6-60m 7.1
Jiraphongsa	2005	JID. 2005;192(S1): S87-93	Thailand	Huaykrajoa district	Rota surveillance	Rural	2001	12	212		6-25m 0.86; 6-11m 1.6; 13-18m 0.7; 19-24m 0.4
Pathela	2006	Acta Paediatrica. 2005;95:430-437.	Bangladesh	Mirzapur	Diarrhea surveillance	Rural	1993	24	499.25	252	0-5m 3.7; 6-11m 5.0; 12-17m 4.8; 18-23m 3.2; 0-23m 4.25
Genser	2006	Epidemiology. 2006;17:658-667.	Brazil	Salvador	Diarrhea surveillance/risk factors	Urban	2000	16	781.98	902	0-50m 3.1
Long	2006	Am J Clin Nut. 2006;83(3):693–700	Mexico	Mexico city	Factorial RCT of zinc vs Vitamin A vs zinc+Vitamin A	Peri urban		12	157.5	183	6-27m 2.38
Qadri	2007	Infection and Immunity 75(8)- 3961-3968.	Bangladesh	Mirpur, Dhaka	ETEC incidence and surveillance	Urban	2002	30		254	0-24m 2.43
Banerjee	2007	The Journal of Infectious Diseases. 2007;195:645-32.	India	Vellore, South India	Rota surveillance	Urban Slum	2002	32	596.9	300	0-24m 2.26
Gupta	2007	Ped Inf Dis J. 2007; 26(4):306-10	India	West Bengal	Community-based effectiveness study of zinc for prevention	Rural	2003	12	1310		6-23m 1.03 24-59m 1.53
Sazawal	2007	BMJ. 2007;334(140): 1-5	India	Near Delhi	Community-based RCT of fortified milk	Peri urban	2000	24		317	12-35m 5.36
Tielsch	2007	J Nut. 2007;137: 2470-74	India	Tamil Nadu	Community-based RCT of Vitamin A	Rural	1998	34	2917		0-5m 1.15
Tielsch	2007	Lancet. 2007; 370(9594): 1230–39	Nepal	Sarlahi district	Community-based factorial trial of zinc, iron+folic acid or iron+folic acid+zinc	Rural	2001		1341		1-35m 3.12
Melo	2008	Brazil JID 2008;12(1):89-93	Brazil	Salvador	Surveillance	Urban Slum		12		84	0-39m 2.8
Estrada-Garcia	2009	Journal of Clinical Microbiology. 2009;47: 93-98.	Mexico	Mexico city	E Coli Surveillance	Peri urban	1998	27	63	76	0-39m 3.96
Chhagan	2009	Eur J Clin Nut. 2009;63:850-857.	South Africa	KwaZulu-Natal Province	Effect of Micronutrient supplementation on diarrheal disease	Rural	2003	32		105	6-24m 2.92
Gladstone	2010	Journal of Tropical Pediatrics. 2010;56:221-226	India	Vellore/Tamil Nadu	Surveillance	Urban Slum	2002	54	1162	373	0-36m 2.17
Sy	2010	Med Trop. 2010;70:57-61.	Senegal	Rufisque	Surveillance	Urban	2002	12		388	0-60m 6.5
